# Supplementary material for: Disruption of PHF21A causes syndromic intellectual disability with craniofacial anomalies, epilepsy, hypotonia, and neurobehavioral problems including autism
Source: Mol Autism. 2019 Oct 22;10:35. doi: 10.1186/s13229-019-0286-0 (PMC6805429; doi:10.1186/s13229-019-0286-0)
Supplement: Supplementary file 1 — List of 520 genes in the intellectual disability panel. (XLSX 17 kb) [file 13229_2019_286_MOESM1_ESM.xlsx]

## Sheet: Feuil1
List of 520 genes in the intellectual disability panel
ACAN	ATP6AP2	CLCN2	DPP6	GOSR2	KCNMA1	MYT1L	PHGDH	SCN1A	STAG1	VLDLR
ACAT1	ATP7A	CLCN4	DPYD	GPC3	KCNQ2	NAA10	PHIP	SCN1B	STAMBP	VPS13B
ACSL4	ATP7B	CLIC2	DSCAM	GPRASP1	KCNQ3	NAGLU	PIGA	SCN2A	STIL	WAC
ACTB	ATR	CLN3	DYNC1H1	GRIA3	KCNT1	NALCN	PIGN	SCN8A	STX1A	WAC
ACTG1	ATRX	CLN5	DYRK1A	GRID2	KCTD13	NDE1	PIGO	SEMA5A	STX1B	WDR45
ACY1	AUTS2	CLN6	EBF3	GRIK2	KCTD7	NDST1	PIGV	SET	STXBP1	WDR62
ADA	BCKDHA	CLN8	EEF1A2	GRIN1	KDM5B	NDUFA1	PLCB1	SETBP1	SUV420H1	WHSC1
ADAT3	BCKDHB	CLTC	EFTUD2	GRIN2A	KDM5C	NECAP1	PLP1	SETD1A	SYN1	WNK3
ADCK3	BCKDK	CNKSR2	EHMT1	GRIN2B	KDM6A	NEDD4L	PMM2	SETD2	SYNGAP1	WWOX
ADNP	BCL11A	CNOT3	EIF2S3	GRIP1	KIAA2022	NF1	PNKP	SETD5	SYNJ1	YWHAE
ADSL	BCOR	CNTN4	EIF4E	GTF2I	KIF1A	NFIX	PNPO	SGSH	SYP	ZBTB18
AFF2	BMP3	CNTNAP2	ELP2	GUSB	KLF8	NGFR	POGZ	SHANK1	SZT2	ZBTB20
AGA	BRAF	COL4A3BP	EN2	HCCS	KLHL15	NHLRC1	POLG	SHANK2	TAB2	ZC3H14
AHDC1	BRD3	COL4A3BP	EP300	HCFC1	KMT2C	NHS	POMGNT1	SHANK3	TAF1	ZC4H2
AHI1	BRPF1	CPA6	EPB41L1	HCN1	KMT2D	NIPBL	PORCN	SKI	TAOK2	ZDHHC9
ALDH18A1	BRWD1	CPS1	EPM2A	HCN2	L1CAM	NLGN3	POU1F1	SLC13A5	TBC1D24	ZEB2
ALDH3A2	BRWD3	CRBN	ERLIN2	HDAC4	LAMC3	NLGN4X	PPM1D	SLC16A2	TBCK	ZFHX4
ALDH5A1	BTD	CREBBP	FGD1	HDAC8	LAMP2	NPC1	PPP2R1A	SLC17A5	TBL1XR1	ZMYND11
ALDH7A1	BTF3	CSDE1	FLNA	HEPACAM	LAS1L	NPC2	PPP2R5D	SLC1A1	TBR1	ZNF292
ALDOB	C12orf57	CSNK2A1	FMR1	HERC1	LGI1	NRXN1	PPP2R5D	SLC1A4	TBX1	ZNF711
ALG1	CA8	CSTB	FOLR1	HEXA	LIMK1	NRXN2	PPT1	SLC25A13	TCF20
ALG12	CACNA1C	CTCF	FOXG1	HGSNAT	LRP2	NSD1	PQBP1	SLC25A15	TCF4
ALG13	CACNA1D	CTNNB1	FOXP1	HIVEP2	LRRC43	NSDHL	PRICKLE1	SLC25A22	TECR
ALG3	CACNA1F	CTSF	FOXP2	HMGA2	MACROD2	NSUN2	PRKRA	SLC2A1	THOC6
ALG6	CACNG2	CUL3	FRMPD4	HNRNPU	MAGEL2	NTNG1	PRODH	SLC35A2	TIMM8A
AMT	CAMTA1	CUL4B	FTSJ1	HOXA1	MAGI2	OCRL	PRPS1	SLC35A3	TMLHE
ANK2	CASK	CUX2	FUCA1	HPRT1	MAN1B1	OFD1	PRRT2	SLC35C1	TNK2
ANK3	CASR	CYFIP1	GABBR2	HRAS	MAN2B1	OPHN1	PRSS12	SLC46A1	TPP1
ANKRD11	CBS	CYP11A1	GABRA1	HSD17B10	MANBA	OTC	PSAP	SLC6A1	TPP1
AP1S2	CC2D1A	CYP27A1	GABRB2	HUWE1	MAOA	OXTR	PTCHD1	SLC6A4	TRAPPC9
AP4B1	CCDC22	CYP2U1	GABRB3	IDS	MAST1	PACS1	PTEN	SLC6A8	TRIO
AP4E1	CDH10	D2HGDH	GABRD	IDUA	MBD5	PAH	PTPN11	SLC9A6	TRIP12
AP4M1	CDH9	DBT	GABRG2	IGF1	MBTPS2	PAK3	PTS	SMAD4	TRPC5
AP4S1	CDK13	DCX	GALT	IGF1R	MCPH1	PAX5	PUF60	SMARCA2	TSC1
ARFGEF2	CDK5RAP2	DDHD2	GAMT	IKBKG	MECP2	PCCA	PURA	SMARCA4	TSC2
ARHGEF9	CDK6	DDX3X	GAP43	IL1RAPL1	MED12	PCCB	QARS	SMARCB1	TSPAN7
ARID1A	CDKL5	DEAF1	GATAD2B	IQSEC2	MED13L	PCDH19	QRICH1	SMARCE1	TUBA1A
ARID1B	CENPJ	DEPDC5	GATM	ITPR1	MED17	PCDH8	RAB39B	SMC1A	TUBB2B
ARIH1	CEP152	DHCR7	GBA	IVD	MED23	PCGF2	RAI1	SMC3	TUSC3
ARSA	CHAMP1	DISC1	GCDH	KANSL1	MEF2C	PDHA1	RBM10	SMS	UBE2A
ARX	CHD2	DKC1	GCH1	KANSL2	MET	PDHX	RELN	SOBP	UBE3A
ASAH1	CHD4	DLG1	GCSH	KAT6A	MFSD8	PEX1	RLIM	SOX11	UBE3B
ASH1L	CHD5	DLG3	GDI1	KAT6B	MID1	PEX12	RLIM	SOX3	UBR1
ASL	CHD7	DNM1	GFPT2	KATNAL2	MLL/KTM2A	PEX6	RNF135	SOX5	UNC13
ASPA	CHD8	DNM3	GK	KCNA1	MMACHC	PEX7	RORA	SOX7	UNC80
ASPM	CHRNA2	DNMT3A	GLDC	KCNB1	MSL3	PGAP2	RORB	SPTAN1	UPB1
ASS1	CHRNA4	DNMT3B	GLUD1	KCNC1	MTHFR	PGAP3	RPL10	SRCAP	UPF3B
ASXL1	CHRNA7	DP71	GNAI1	KCNH1	MTR	PHF21A	RPS6KA3	SRD5A3	USP27X
ASXL3	CHRNB2	DPAGT1	GNAO1	KCNJ10	MUT	PHF6	SATB2	ST3GAL3	USP9X
ATIC	CIC	DPM1	GNB1	KCNK9	MYCN	PHF8	SCARB2	ST3GAL5	VCP
